# Supplementary material for: Ferrocene substitution in amino acids strengthens the axial binding in Cu(ii) complexes and separates the hydrophobic and hydrophilic region in the crystals
Source: Royal Society of Chemistry journal article supplement (doi:10.1039/b709662c), 2007-01-01
Supplement: b709662c.pdf [file b709662c.pdf]

## Ferrocene substitution in amino acid strengthens the axial binding in Cu(II) complexes and separates the hydrophobic and hydrophilic region in the Crystals

Subash Chandra Sahoo and Manabendra Ray\*

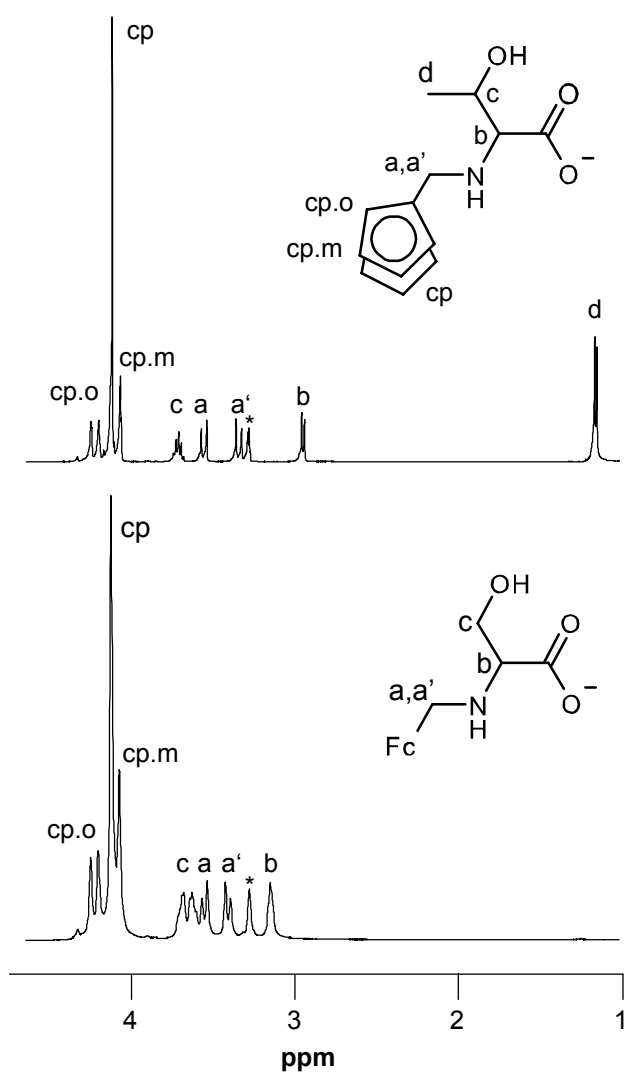

**Figure S1.** NMR spectra of **4** and **3** in CD<sub>3</sub>OD with 1 eq. of LiOH.

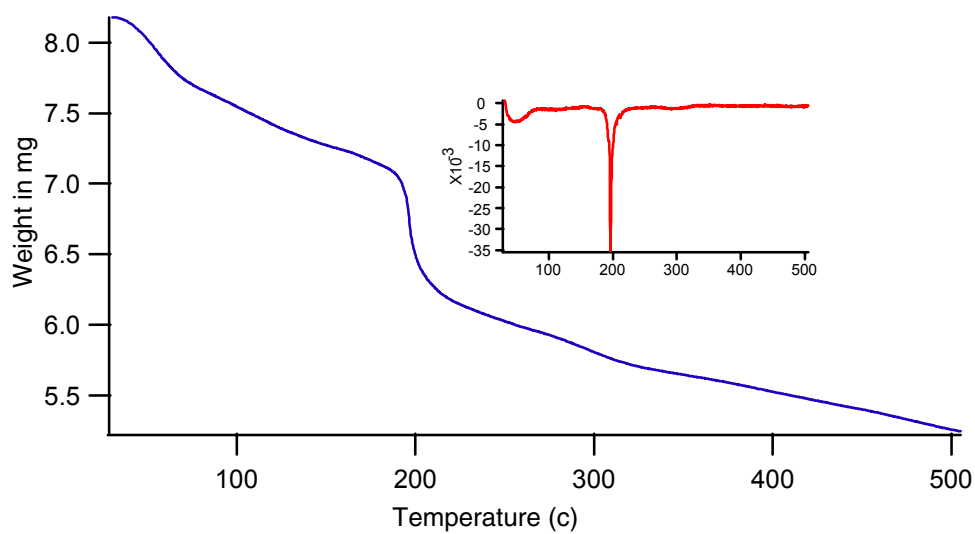

**Figure S2.** TGA plot of **2a** with derivative (DTA) plot of TGA as inset.

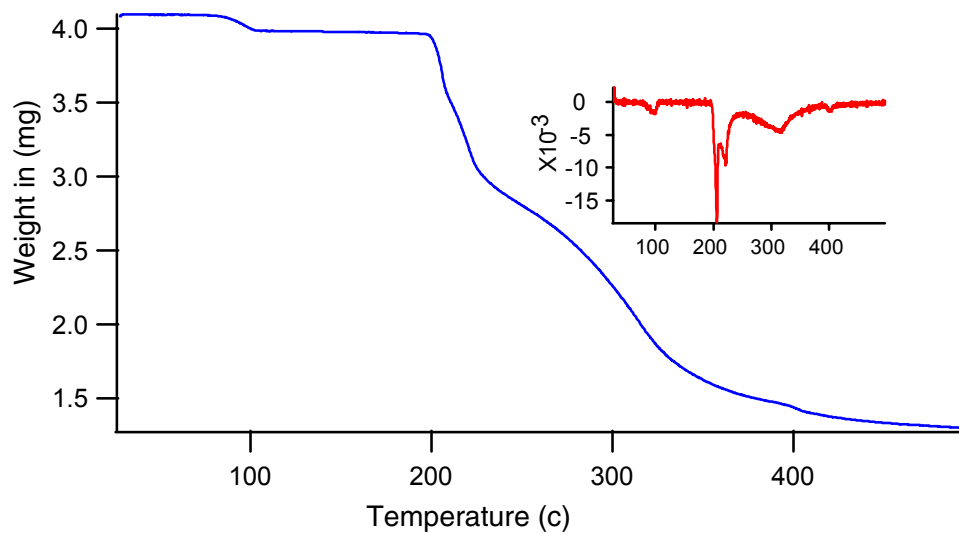

**Figure S3.** TGA plot of **3a** with derivative (DTA) plot of TGA as inset.

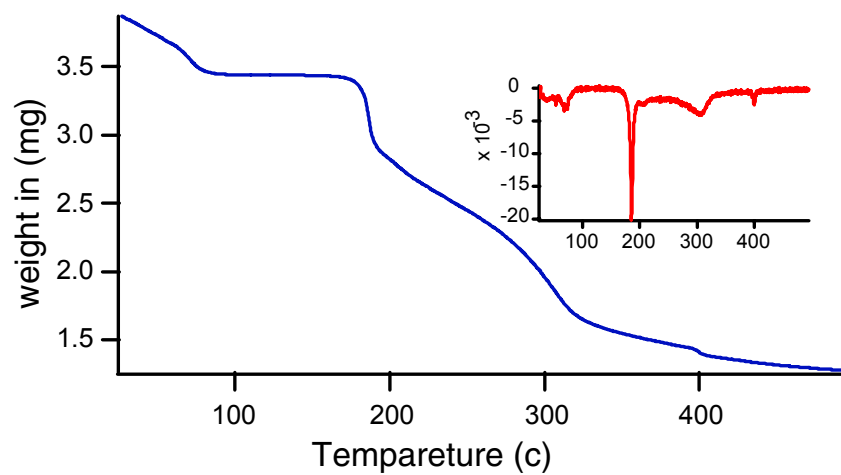

**Figure S4.** TGA plot of **4a** with derivative (DTA) plot of TGA as inset.

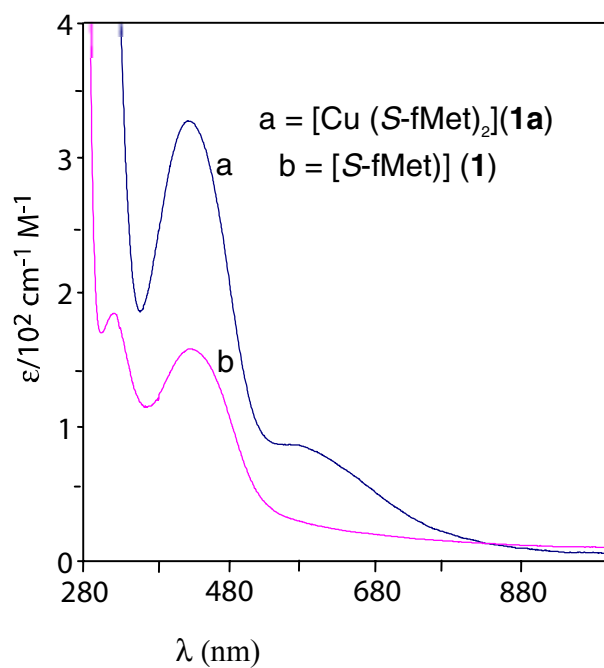

**Figure S5.** The UV-vis spectra of **1a** in MeOH and **1** in MeOH & LiOH.

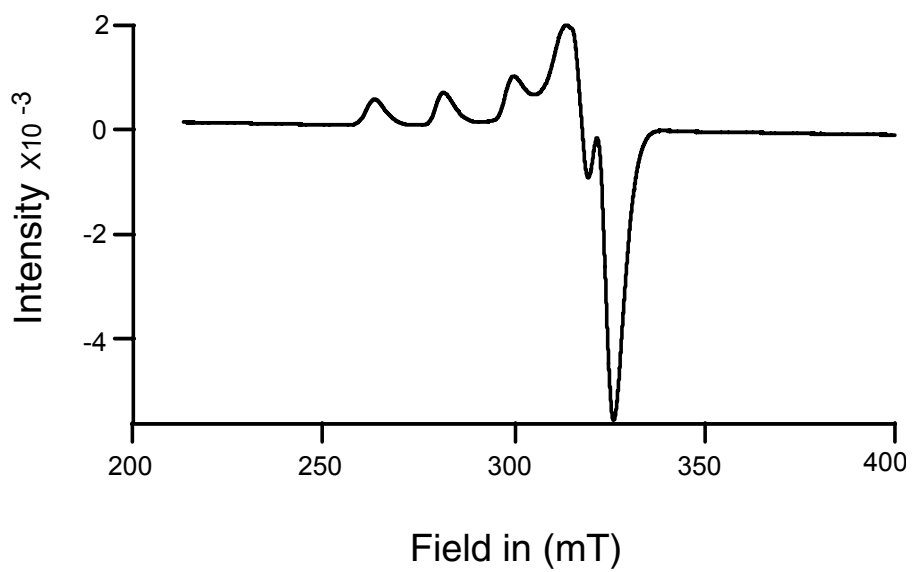

**Figure S6.** EPR of **1a** in MeOH at 77k.

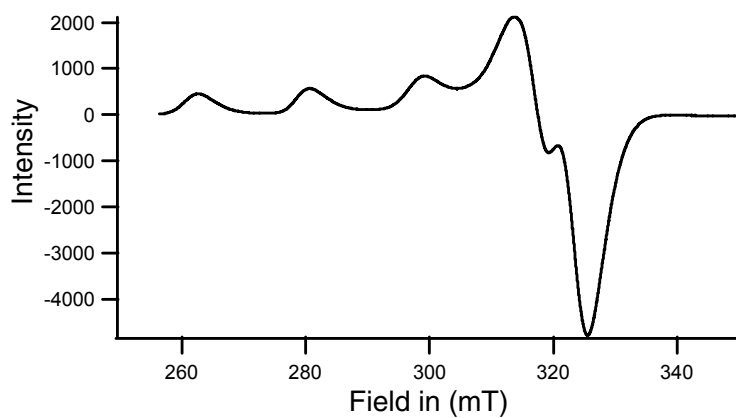

**Figure S7.** EPR of **3a** in MeOH at 77k.

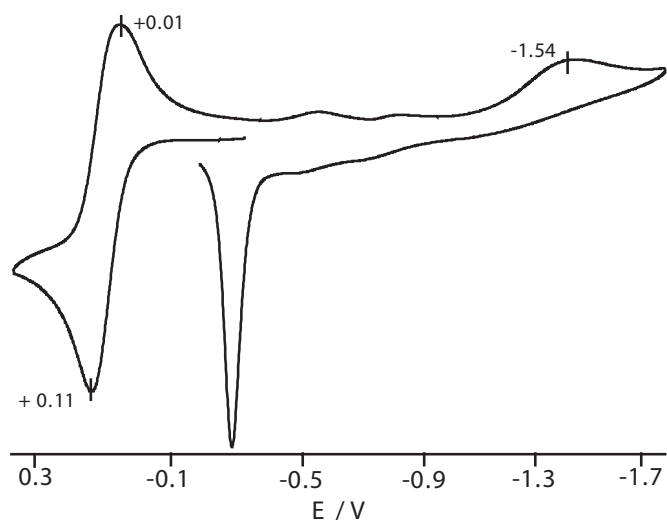

**Figure S8.** Cyclic Voltammogram of **1a** in DMF.  
Condition: Scan rate  $50 \text{ mV S}^{-1}$ , glassy carbon working electrode.  
Supporting electrolyte Tetrabutylammonium perchlorate. Potentials shown are vs  $\text{Fc}^+/\text{Fc}$ .

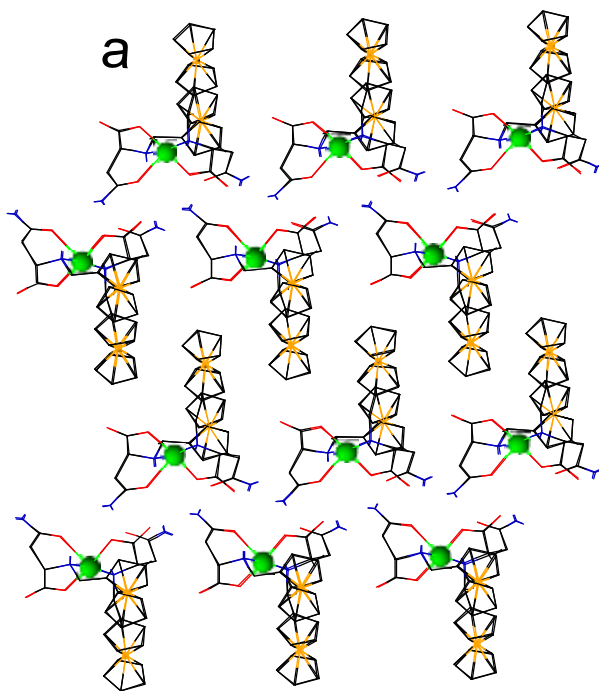

**Figure S9.** Alternative layers of hydrophilic and hydrophobic regions in **2a**.

**Table S1.** Selected Bond Lengths (Å) and angles (°) for **1a**, **2a**, **3a**, **4a** and their amino acid analogue.

|             | <b>1a</b>  | Cu(L-meth) <sub>2</sub> | <b>2a</b> | Cu(L-asn) <sub>2</sub> | <b>3a</b>  | Cu(L-ser) <sub>2</sub> | <b>4a</b>             | Cu(L-thr) <sub>2</sub> |
|-------------|------------|-------------------------|-----------|------------------------|------------|------------------------|-----------------------|------------------------|
| Cu-N1       | 2.0188(15) | 1.97(1)                 | 1.985(5)  | 2.004(28)              | 2.0172(16) | 1.988(6)               | 2.014(3)              | 1.968(8)               |
| Cu-N1A      | 2.0288(16) | 2.01(1)                 | 2.003(5)  | 2.035(26)              | 2.0172(16) | 1.975(6)               | 2.009(3)              | 1.982(8)               |
| Cu-O1       | 1.9406(15) | 1.970(8)                | 1.927(5)  | 1.947(21)              | 1.9206(15) | 1.970(6)               | 1.946(3)              | 1.941(7)               |
| Cu-O1A      | 1.9194(14) | 1.944(8)                | 1.923(4)  | 1.954(22)              | 1.9275(15) | 1.952(6)               | 1.937(3)              | 1.957(7)               |
| Cu-axial    | 2.7906(6)  | 2.751(7)                | 2.414(5)  | 2.529(20)              | 2.3876(17) | 2.359(6)               | 2.258(4)              | 2.478(8)               |
|             | Cu-S       | Cu-O <sub>carbo</sub>   |           |                        |            |                        | Cu-O <sub>water</sub> | Cu-O <sub>carbo</sub>  |
| N1-Cu-O1A   | 94.22(6)   | 95.9(4)                 | 96.8(2)   | 96.1(10)               | 92.14(6)   | 82.4(2)                | 96.47(13)             | 96.4(3)                |
| O1A-Cu-N1A  | 85.05(6)   | 84.2(4)                 | 83.94(19) | 82.4(9)                | 85.61(7)   | 88.3(2)                | 85.00(12)             | 83.4(3)                |
| N1A-Cu-O1   | 95.02(6)   | 96.3(4)                 | 97.2(2)   | 94.5(10)               | 95.62(7)   | 83.9(2)                | 92.46(12)             | 96.2(3)                |
| O1-Cu-N1    | 84.28(6)   | 83.7(4)                 | 83.4(2)   | 86.9(10)               | 85.40(7)   | 105.0(2)               | 84.37(12)             | 83.6(3)                |
| N1-Cu-axial | 86.34(4)   | 89.3(3)                 | 82.76(19) | 94.6(9)                | 99.56(7)   |                        | 99.50(13)             | 93.2(3)                |
| axial-Cu-O1 | 91.70(5)   | 85.0(3)                 | 86.92(19) | 93.5(8)                | 87.57(6)   |                        | 91.67(14)             | 89.7(3)                |
| O1-Cu-O1A   | 174.48(6)  | 179.6(4)                | 174.6(2)  | 176.2(10)              | 173.83(7)  | 170.7(2)               | 174.49(13)            | 177.5(3)               |
| N1-Cu-N1A   | 164.99(6)  | 175.0(3)                | 166.7(2)  | 175.3(10)              | 167.93(7)  | 172.2(2)               | 161.30(13)            | 172.1(3)               |
|             |            | Ref. 3(d)               |           | Ref. 3(c)              |            | Ref.3(b)               |                       | Ref. 3(f)              |
